# Supplementary material for: Unique small RNA signatures uncovered in the tammar wallaby genome
Source: PubMed Central journal article supplement (PMC3576234; doi:10.1186/1471-2164-13-559), 2012-10-17

Supplemental Figure 2

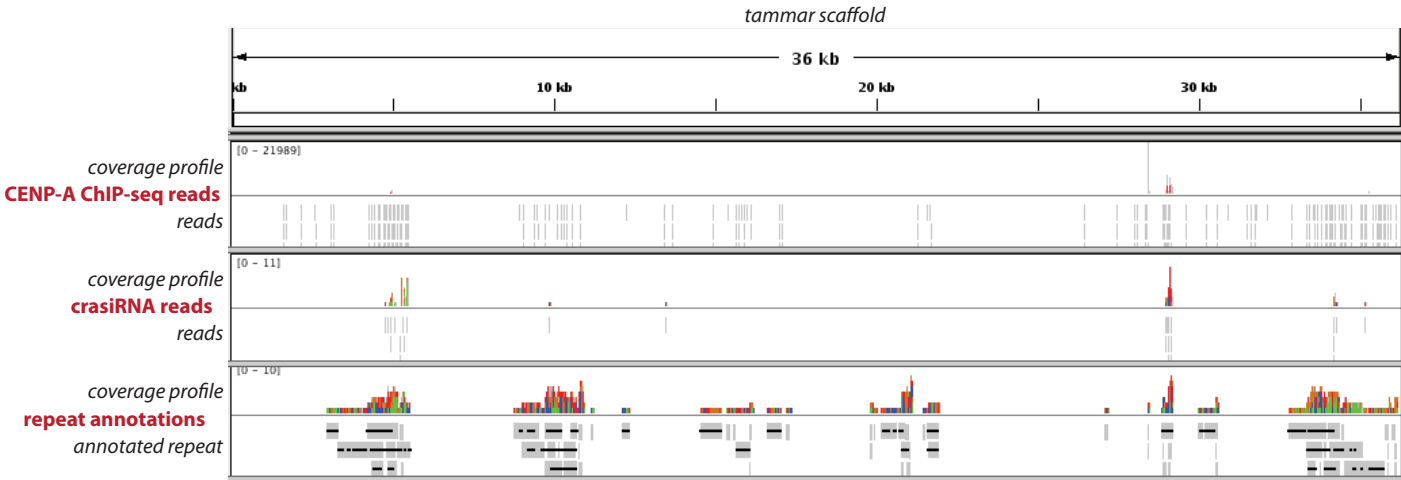

Supplement: 1471-2164-13-559-S5.pdf [file 1471-2164-13-559-S5.pdf]
